# Supplementary material
Source: PubMed Central journal article supplement (PMC3959164)
Supplement: NIHMS553500-supplement-Supplementary_Materials.pdf [file NIHMS553500-supplement-Supplementary_Materials.pdf]

Supplementary Materials for “Statistical approaches  
to analyzing HIV-1 neutralizing antibody assay  
data”

September 20, 2010

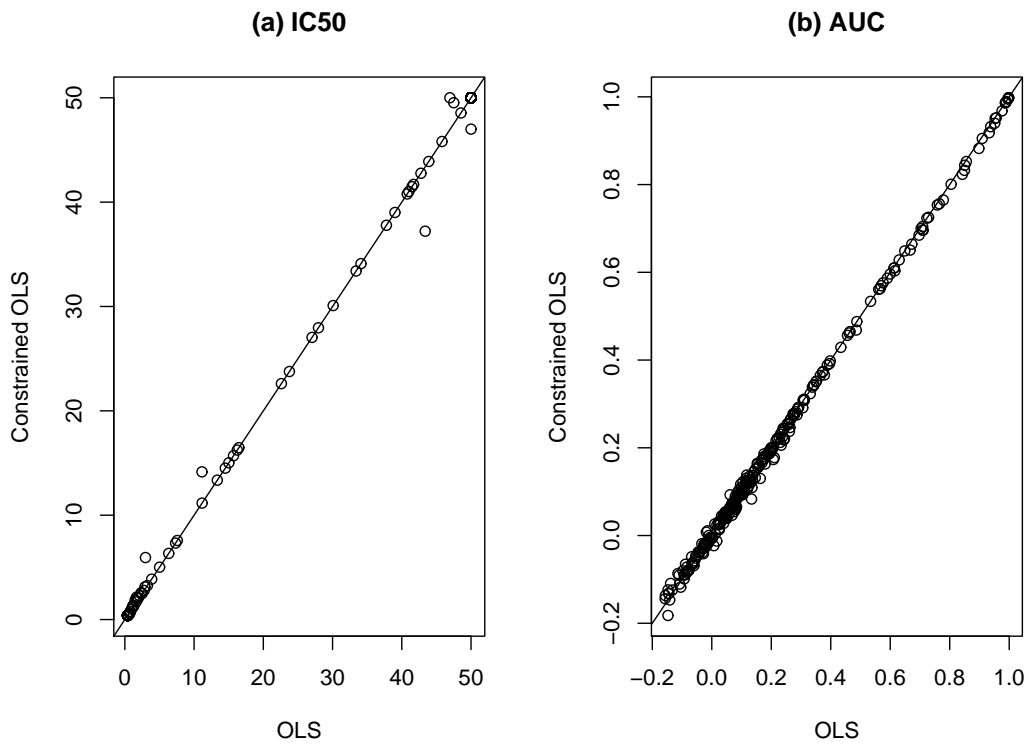

Figure 1: Scatter plot of estimated IC50 and AUC using un-constrained regression (OLS) versus constrained regression (constrained OLS) for the real TZM-bl assay data example. The solid line indicates the diagonal line. The results are comparable.

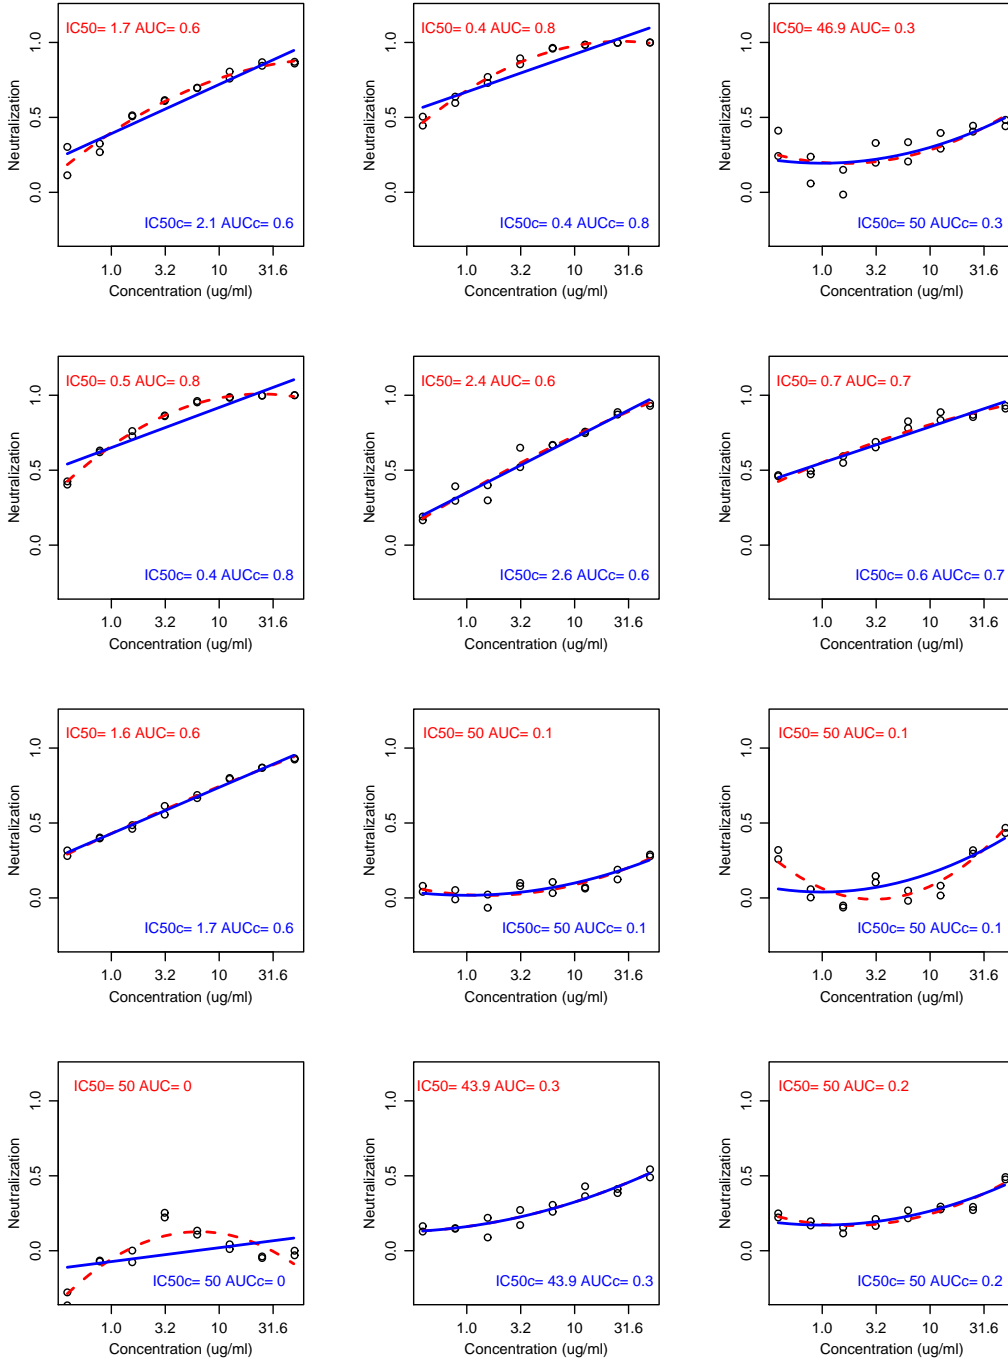

Figure 2: Scatter plot of raw data with fitted titration curves using un-constrained regression (red dotted lines) and constrained regression (solid blue line) for the real TZM-bl assay data example. IC50c and AUCc stands for estimated IC50 and AUC, respectively, using constrained regression.
